# Supplementary material for: Effect of regulating the interfacial structure of multiple non-covalent bonding on improving thermal management capability
Source: Royal Society of Chemistry journal article supplement (doi:10.1039/d3ta05936g), 2023-11-23
Supplement: d3ta05936g1.pdf [file d3ta05936g1.pdf]

## Electronic Supplementary Information

### Effect of regulating the interfacial structure of multiple non-covalent bonding on improving thermal management capability

Xu Li,<sup>a</sup> Bin Wu,<sup>\*a</sup> Ying Lv,<sup>b</sup> Ru Xia,<sup>a</sup> Jiasheng Qian<sup>\*a</sup>

<sup>a</sup> Key Laboratory of Environment-Friendly Polymeric Materials of Anhui Province, School of Chemistry & Chemical Engineering, Anhui University, Hefei, Anhui, 230601, China;

<sup>b</sup> Department of Chemistry and Centre for Atomic Engineering of Advanced Materials, Anhui Province Key Laboratory of Chemistry for Inorganic/Organic Hybrid Functionalized Materials, Key Laboratory of Structure and Functional Regulation of Hybrid Materials of Ministry of Education, Anhui University, Hefei, Anhui, 230601, China.

\* Corresponding authors.

E-mail addresses: lwbin@ahu.edu.cn (B. Wu), qianjsh@ahu.edu.cn (J. Qian)

## **Characterizations.**

X-ray diffractometer (XRD, Rigaku, SmartLab, Japan) measurement was used to analyze the crystal structure of samples. Fourier transform infrared spectroscopy (FTIR, Bruker, TG209F3, Germany) were carried out to analyze functional group of samples. X-ray photoelectron spectroscopy (XPS, Thermo Scientific, Escalab 250Xi, England) was performed to characterize the chemical structure of samples. The morphology of samples was using a scanning electron microscope (SEM, Hitachi, S-4800, Japan and Zeiss, Sigma 500, Germany), atomic force microscopy (AFM, Hitachi, AFM5500M, Japan), and transmission electron microscopy (TEM, JEOL, JEM-2100, Japan). Raman spectrum were conducted by in micro-Raman spectroscopy (Via-Reflex, Renishaw, England). Energy dispersive X-ray spectroscopy (EDS) was used to conduct the element analysis of the sample. The oriented structure of composite was analyzed by 2D Wide-angle X-ray scattering (2D WAXS, Xenocs, Xuess3.0, France). The Zeta potential of the samples was characterized by nano laser particle size meter (Malvern, Zetasizer Nano-zs90, England). The contact angles and the surface tensions of samples were measured by optical contact angle measuring instrument (Kruss, DSA30S, Germany). Thermogravimetric analysis was tested the content of IL for modifying BNNS (TGA, Setaram, Labsys evo, France). The mechanical properties of composite were characterized on a universal material testing machine (Instron 5967, USA). Temperature distribution images of the composites were obtained via an infrared thermograph (FLIR Systems, FLIR T1040, USA). Volume resistivity was measured by automatic resistance measuring instrument (GEST-121A, China). The limited oxygen

index was measured by an oxygen index meter (Nanjing Shangyuan HC-2CZ, China).

Total heat release (THR) and peak heat release rate (PHRR) were characterized by microscale combustion calorimeter (MCC-3, Deatak, USA).

The in-plane thermal conductivities ( $\kappa_{||}$ ) were obtained by the equation

$$\kappa_{||} = \alpha_{||} \times C_p \times \rho \quad (S1)$$

where  $\alpha_{||}$ ,  $C_p$  and  $\rho$  respectively correspond to in-plane thermal diffusivity, specific heat capacity, and density. The  $\alpha_{||}$  and  $C_p$  were measured using a Netzsch LFA 467 and a TA Q2000 Instruments, respectively.  $\rho$  was achieved by the ratio of the mass and volume of the sample.

#### Calculated surface energy

$$\gamma_{sl} = \gamma_{sg} - \gamma_{lg} \cos \theta \quad (S2)$$

where  $\gamma_{sl}$ ,  $\gamma_{sg}$ ,  $\gamma_{lg}$ , and  $\theta$  are solid-liquid interfacial energy of BNNS and H<sub>2</sub>O (or IL solution), solid-gas interfacial energy of BNNS and air, liquid-gas interfacial energy of H<sub>2</sub>O (or IL solution) and air, and equilibrium contact angle of liquid on the solid surface, respectively.  $\gamma_{lg}$  and  $\theta$  were obtained from measurements of surface tension and contact angle from Fig. S2 and Fig. 2a, respectively.  $\gamma_{sg}$  is calculated by the formula (S3) [1].

$$\gamma_{sg} = \gamma_{sg}^d + \gamma_{sg}^p \quad (S3)$$

where  $\gamma_{sg}^d$  and  $\gamma_{sg}^p$  are the dispersive and polar components of the surface energy for BNNS and air.  $\gamma_{sg}^d$  and  $\gamma_{sg}^p$  are calculated by Wu's equation (S4) [2].

$$\gamma(\cos \theta + 1) = 4 \left( \frac{\gamma^d \gamma_{sg}^d}{\gamma^d + \gamma_{sg}^d} + \frac{\gamma^p \gamma_{sg}^p}{\gamma^p + \gamma_{sg}^p} \right) \quad (S4)$$

where  $\gamma$  is the total surface energy, and  $\gamma^d$  and  $\gamma^p$  are the dispersive and polar components of the surface energy, respectively (Table S1).  $\theta$  is contact angle.

$$\left\{ \begin{array}{l} \gamma_{\text{H}_2\text{O}}(\cos \theta_{\text{H}_2\text{O}} + 1) = 4 \left( \frac{\gamma_{\text{H}_2\text{O}}^d \gamma_{\text{sg}}^d}{\gamma_{\text{H}_2\text{O}}^d + \gamma_{\text{sg}}^d} + \frac{\gamma_{\text{H}_2\text{O}}^p \gamma_{\text{sg}}^p}{\gamma_{\text{H}_2\text{O}}^p + \gamma_{\text{sg}}^p} \right) \\ \gamma_{\text{glycerol}}(\cos \theta_{\text{glycerol}} + 1) = 4 \left( \frac{\gamma_{\text{glycerol}}^d \gamma_{\text{sg}}^d}{\gamma_{\text{glycerol}}^d + \gamma_{\text{sg}}^d} + \frac{\gamma_{\text{glycerol}}^p \gamma_{\text{sg}}^p}{\gamma_{\text{glycerol}}^p + \gamma_{\text{sg}}^p} \right) \end{array} \right.$$

where  $\gamma_{\text{H}_2\text{O}}$  and  $\gamma_{\text{glycerol}}$  were the total surface energy of H<sub>2</sub>O and glycerol.  $\gamma_{\text{H}_2\text{O}}^d$  and  $\gamma_{\text{H}_2\text{O}}^p$  are the dispersive and polar components of the surface energy for H<sub>2</sub>O.  $\gamma_{\text{glycerol}}^d$  and  $\gamma_{\text{glycerol}}^p$  are the dispersive and polar components of the surface energy for glycerol (Table S1).  $\theta$  are contact angles of water and glycerol on the surface of FL-BNNS (Fig. S3).

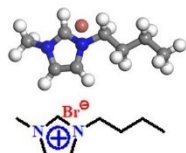

**1-butyl-3-methylimidazolium bromine (4-IL)**

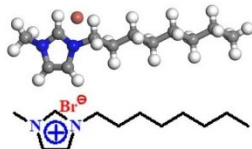

**1-octyl-3-methylimidazolium bromine (8-IL)**

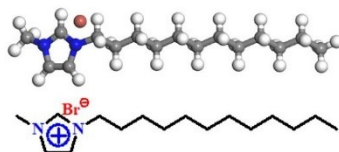

**1-dodecyl-3-methylimidazolium bromine (12-IL)**

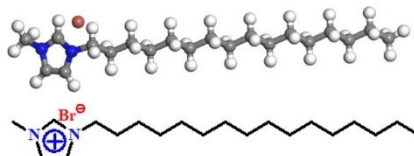

**1-hexadecyl-3-methylimidazolium bromine (16-IL)**

**Fig. S1** Imidazolium ionic liquids with different carbon chain structures.

**Table S1** Surface tension of water and glycerin

| <b>Liquids</b>   | <b><math>\gamma</math> (mJ·m<sup>-2</sup>)</b> | <b><math>\gamma^d</math> (mJ·m<sup>-2</sup>)</b> | <b><math>\gamma^p</math> (mJ·m<sup>-2</sup>)</b> |
|------------------|------------------------------------------------|--------------------------------------------------|--------------------------------------------------|
| H <sub>2</sub> O | 72.8                                           | 21.8                                             | 51.0                                             |
| glycerol         | 63.4                                           | 37.0                                             | 26.4                                             |

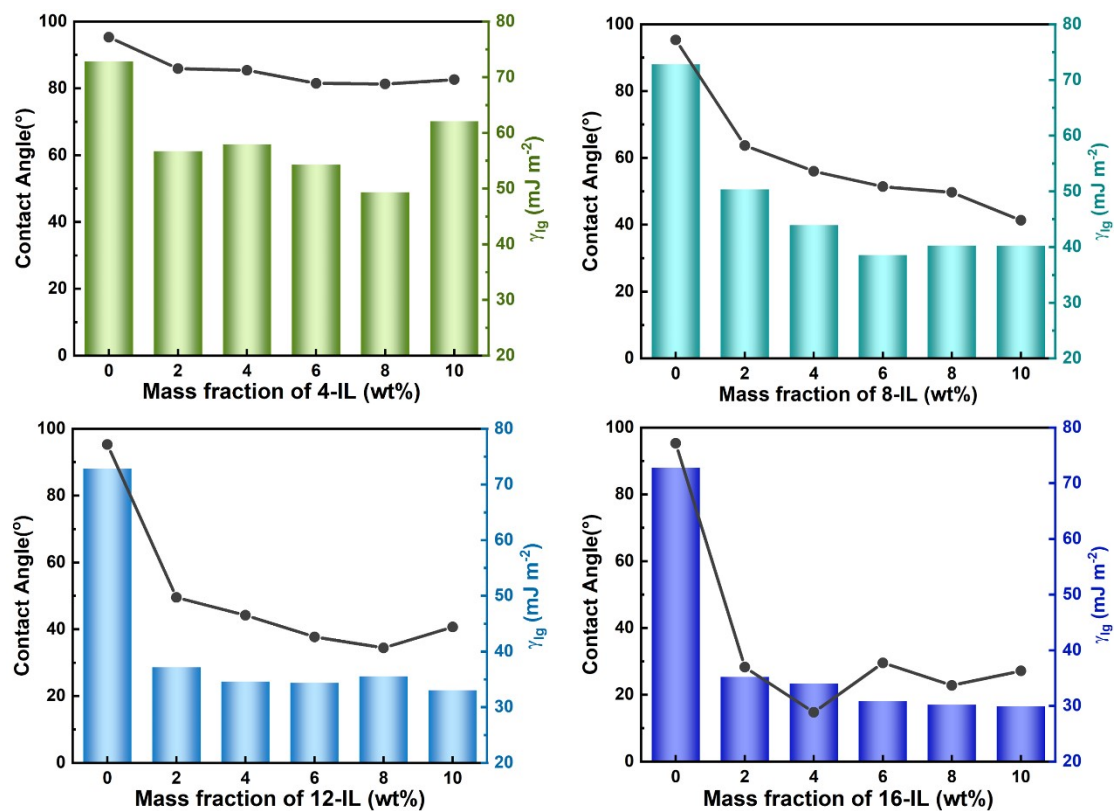

Fig. S2 The contact angle and surface tension as the function of the mass fraction of IL with different side carbon chain lengths.

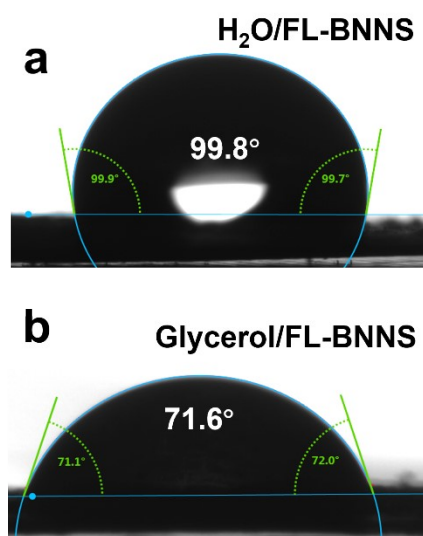

**Fig. S3** Contact angles of  $\text{H}_2\text{O}$  and glycerol on the surface of FL-BNNS, respectively.



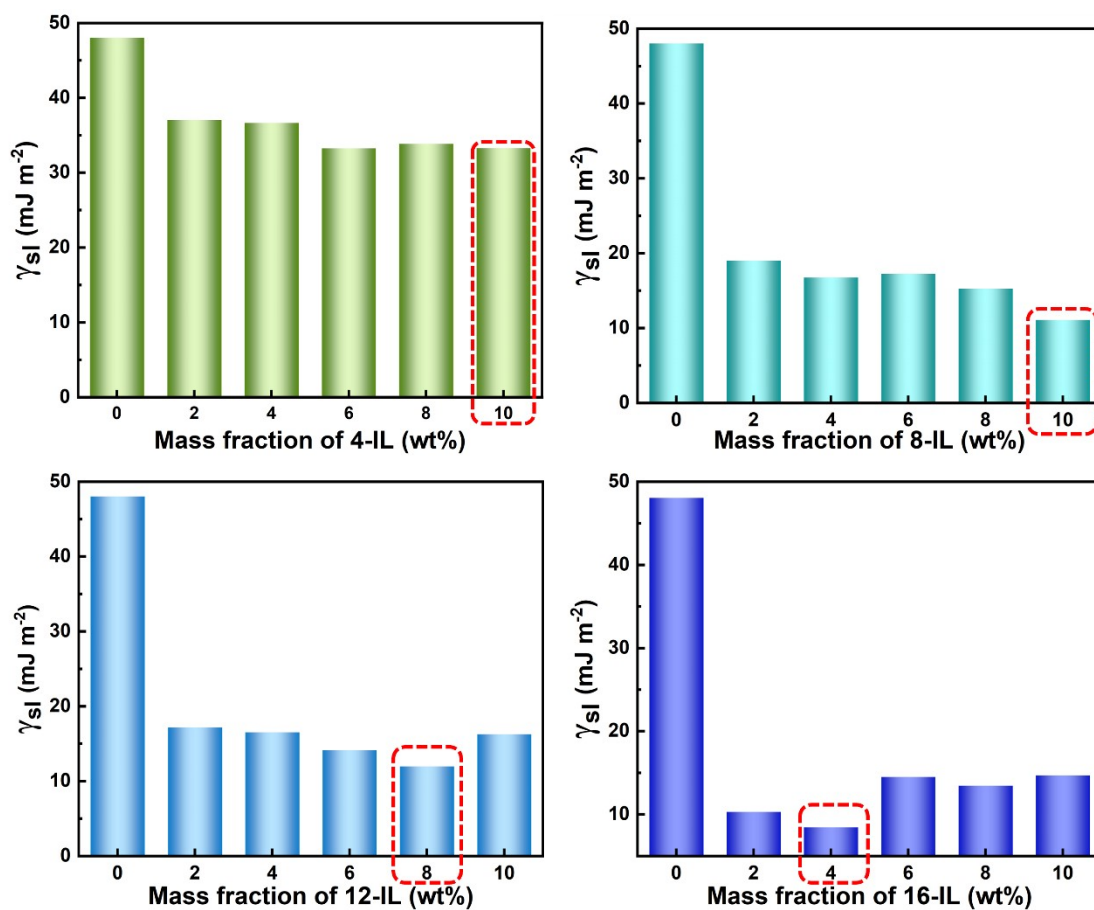

Fig. S4 The solid-liquid surface energy as a function of the mass fraction of IL with different side carbon chain lengths.

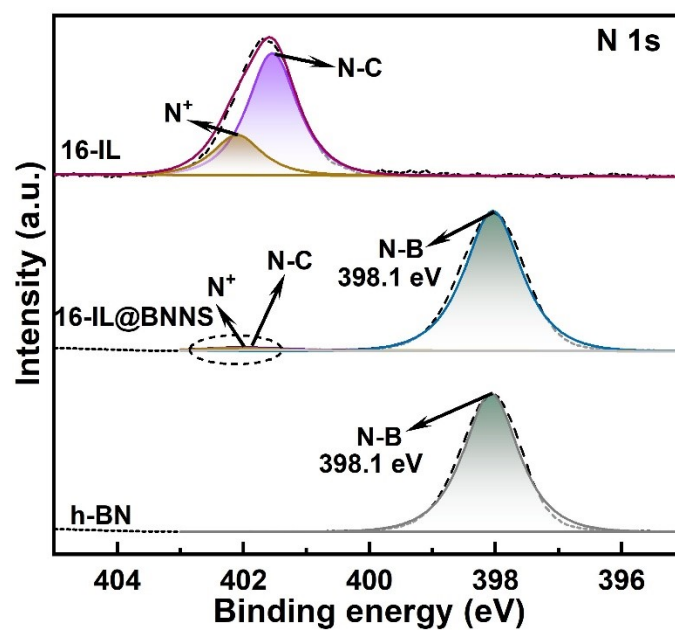

Fig. S5 N 1s XPS spectra of 16-IL, h-BN, and 16-IL@BNNS.

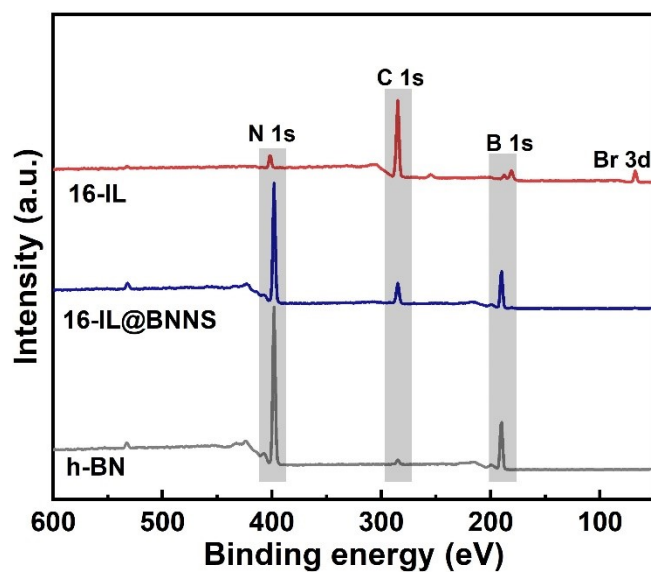

Fig. S6 XPS full spectra of h-BN, 16-IL, and 16-IL@BNNS, respectively.

Table S2 Comparison of atomic concentration of C, N, and B in h-BN and 16-IL@BNNS by the XPS full spectrums.

| Samples    | Atomic concentration (%) |      |      | N/B atomic<br>ration | N/C atomic<br>ration |
|------------|--------------------------|------|------|----------------------|----------------------|
|            | C 1s                     | N 1s | B 1s |                      |                      |
| h-BN       | 2.30                     | 44.3 | 52.4 | 0.85                 | 19.3                 |
| 16-IL@BNNS | 12.1                     | 39.5 | 46.8 | 0.84                 | 3.26                 |

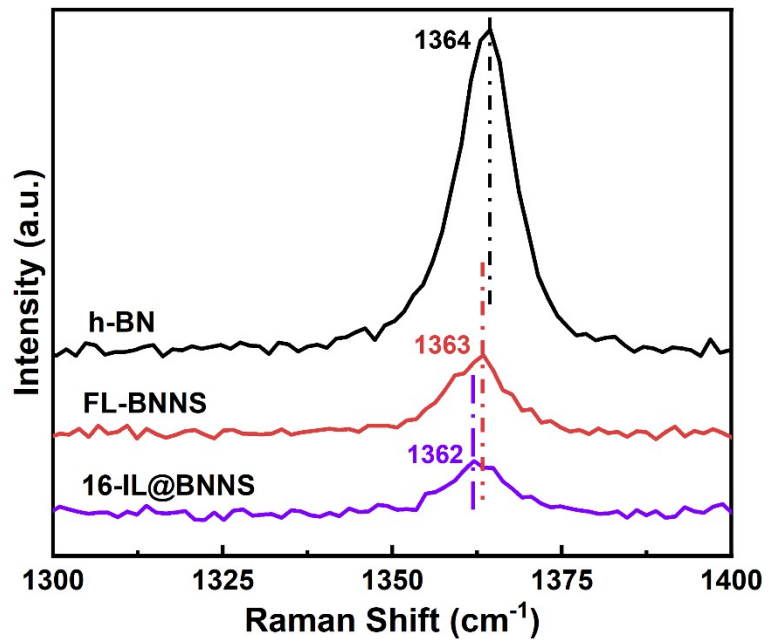

Fig. S7 Raman of h-BN, FL-BNNS, and 16-IL@BNNS, respectively.

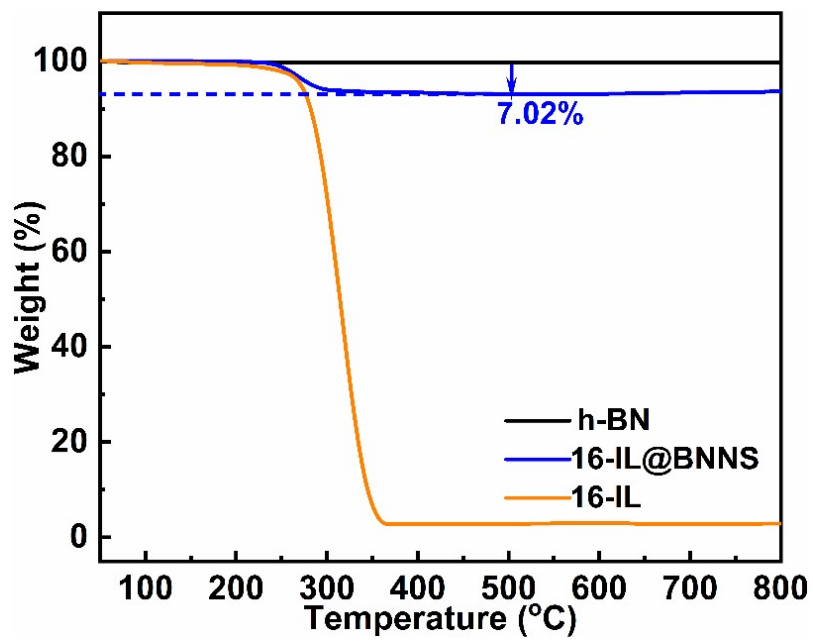

Fig. S8 TGA of 16-IL, h-BN, and 16-IL@BNNS, respectively.

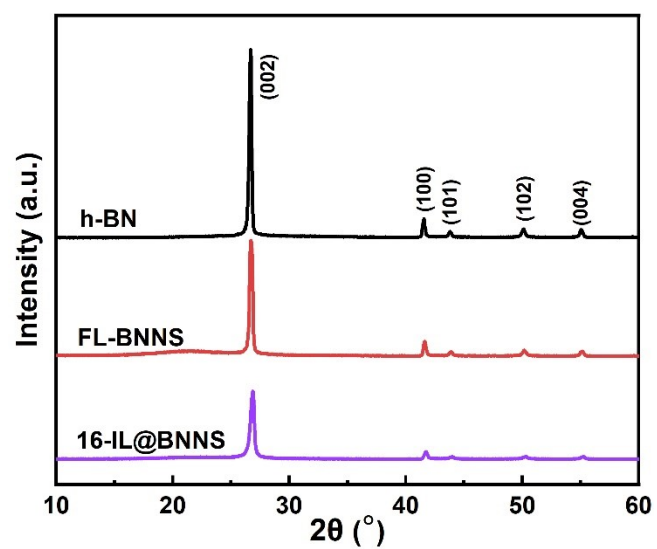

Fig. S9 XRD patterns of h-BN, FL-BNNS, and 16-IL@BNNS, respectively.

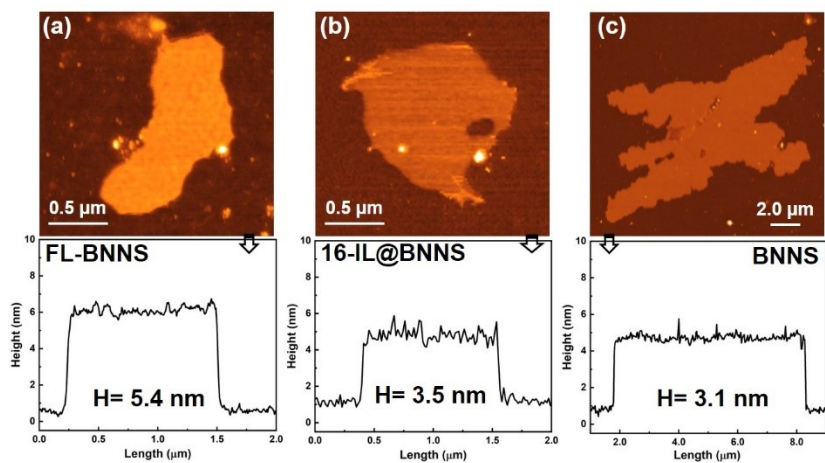

Fig. S10 AFM topographic image of (a) FL-BNNS, (b) 16-IL@BNNS, and (a)BNNS and curves of surface scale.

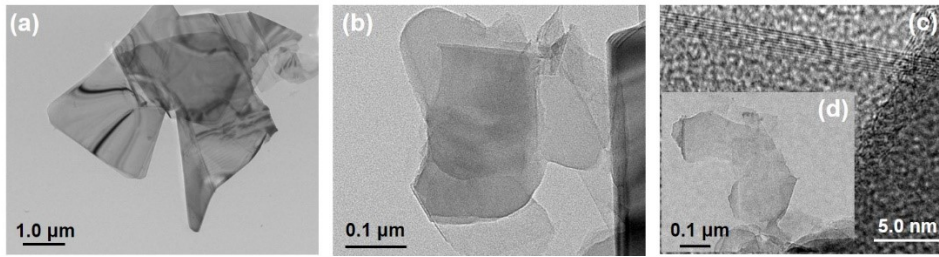

**Fig. S11** TEM of (a) FL-BNNS, (b) 16-IL@BNNS, and (d) BNNS, HRTEM of (c) BNNS.



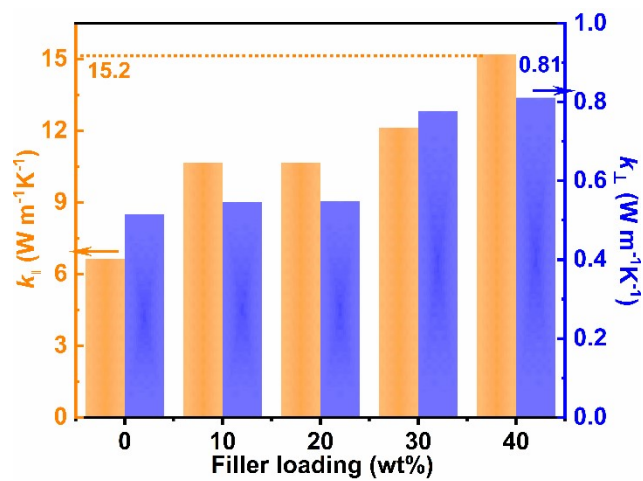

**Fig.S12**  $k_{||}$  and  $k_{\perp}$  of 16-IL@BNNS/ANF with different filler loading.

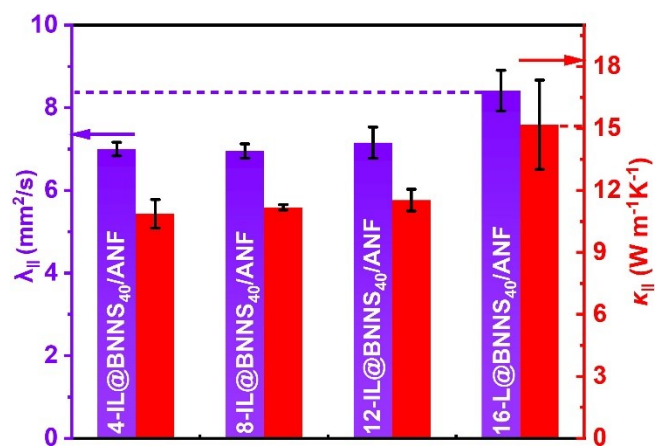

Fig. S13  $\lambda_{||}$  and  $k_{||}$  of  $\gamma$ -IL@BNNS<sub>40</sub>/ANF ( $\gamma=4, 8, 12,$  and  $16,$  the number of carbon atoms in the alkyl chain).

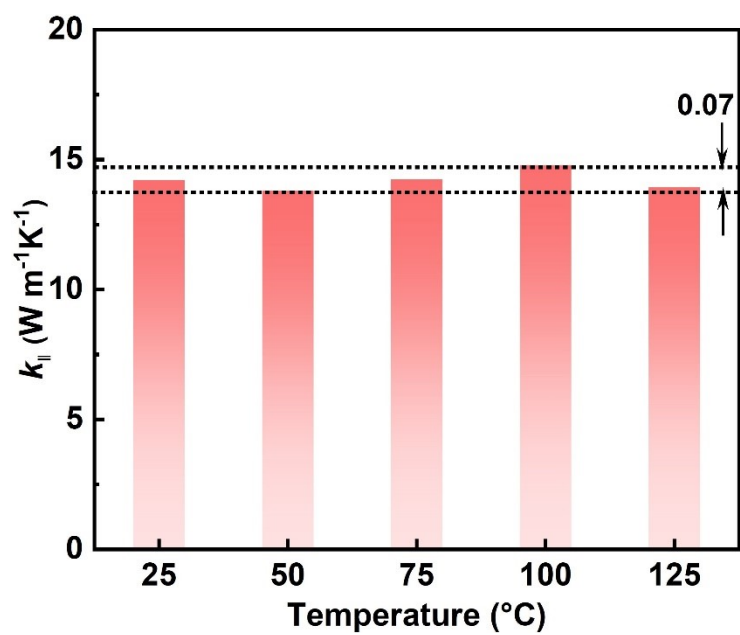

Fig. S14 Relationship between temperature and thermal conductivity of 16-IL@BNNS/ANF.

**Table S3** Thermal conductivity (TC) of BNNS-based composites at room temperature

| <b>Materials</b>              | <b>Loading</b> | <b>TC (<math>\text{W m}^{-1} \text{K}^{-1}</math>)</b> | <b>Interface structure</b>  | <b>References</b> |
|-------------------------------|----------------|--------------------------------------------------------|-----------------------------|-------------------|
| BNNS/PVDF                     | 60 wt%         | 11.88                                                  | none                        | [3]               |
| MVQ/ABN                       | 54 vol%        | 6.34                                                   | none                        | [4]               |
| Wax-BNNS                      | 50 wt%         | 3.47                                                   | none                        | [5]               |
| PVDF/BNNS                     | 4 wt%          | 4.69                                                   | covalent bond               | [6]               |
| APTES-BNNS/EP                 | 40 wt%         | 5.86                                                   | covalent bond               | [7]               |
| f-BNNS/SCLCP                  | 30 wt%         | 2.46                                                   | covalent bond               | [8]               |
| BNNS/EVA                      | 50 wt%         | 13.2                                                   | van der Waals               | [9]               |
| NF-BNNS/PMMA                  | 80 wt%         | 10.2                                                   | physical adsorption         | [10]              |
| CNFs/BNNS-p-APP               | 33.3 wt%       | 9.10                                                   | electrostatic interaction   | [11]              |
| Epoxy/3D-C-BNNS               | 9.6 vol%       | 3.12                                                   | hydrogen bond               | [12]              |
| LS0.2-BN/CNF/CNF              | 50 wt%         | 1.22                                                   | hydrogen bond               | [13]              |
| PVA/30BP-2.7BNNS              | 31.92 wt%      | 9.45                                                   | hydrogen bond               | [14]              |
| m-BN/PVDF                     | 40 wt%         | 6.50                                                   | $\pi$ - $\pi$               | [15]              |
| BNNS@PDA/ANF                  | 50 wt%         | 3.94                                                   | $\pi$ - $\pi$               | [16]              |
| PEI/(PI-BN)                   | 60 wt%         | 3.3                                                    | $\pi$ - $\pi$               | [17]              |
| PVA/BNNS-PDA-Ag/GO            | 14 wt%         | 7.04                                                   | $\pi$ - $\pi$               | [18]              |
| BNNS/HBPE@PSF                 | 40 wt%         | 3.28                                                   | CH- $\pi$ and $\pi$ - $\pi$ | [19]              |
| BNNS/PVA                      | 92.5 wt%       | 12.2                                                   | cation- $\pi$               | [20]              |
| BNNS/Si-GFs/E-44              | 15 wt%         | 2.75                                                   | cation- $\pi$               | [21]              |
| 16-IL@BNNS <sub>40</sub> /ANF | 40 wt%         | 15.2                                                   | cation- $\pi$ and CH- $\pi$ | This work         |

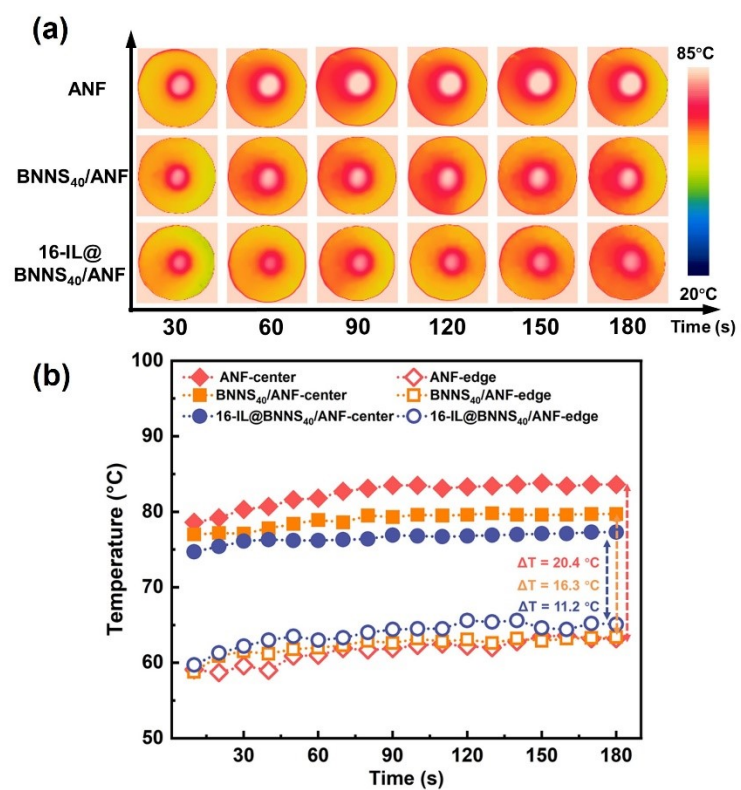

Fig. S15 (a) The infrared thermal images and (b) the central point and edge temperatures curves of ANF, BNNS<sub>40</sub>/ANF, and 16-IL@BNNS<sub>40</sub>/ANF at different times, respectively.

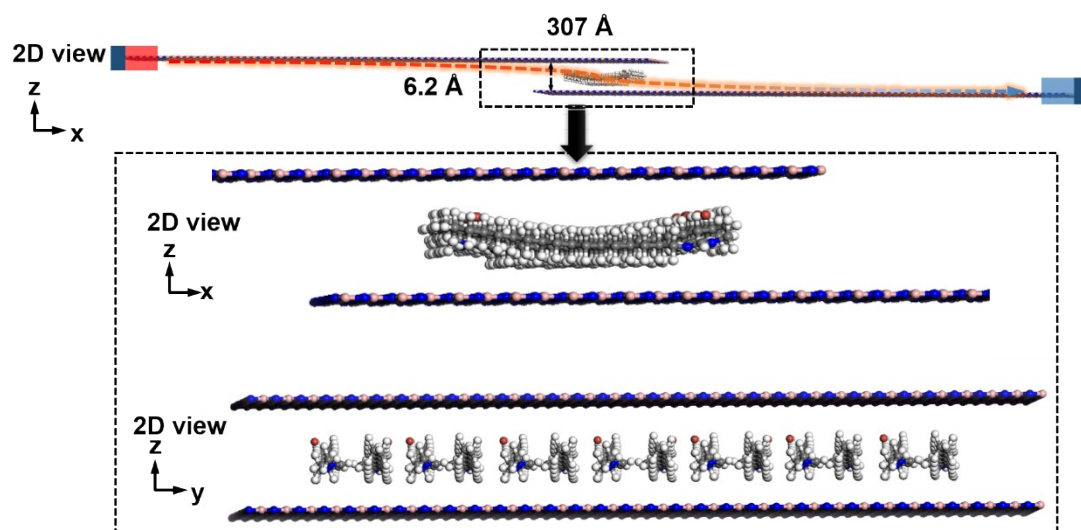

Fig. S16 Simulation modeling of IL<sub>16</sub>@BNNs.

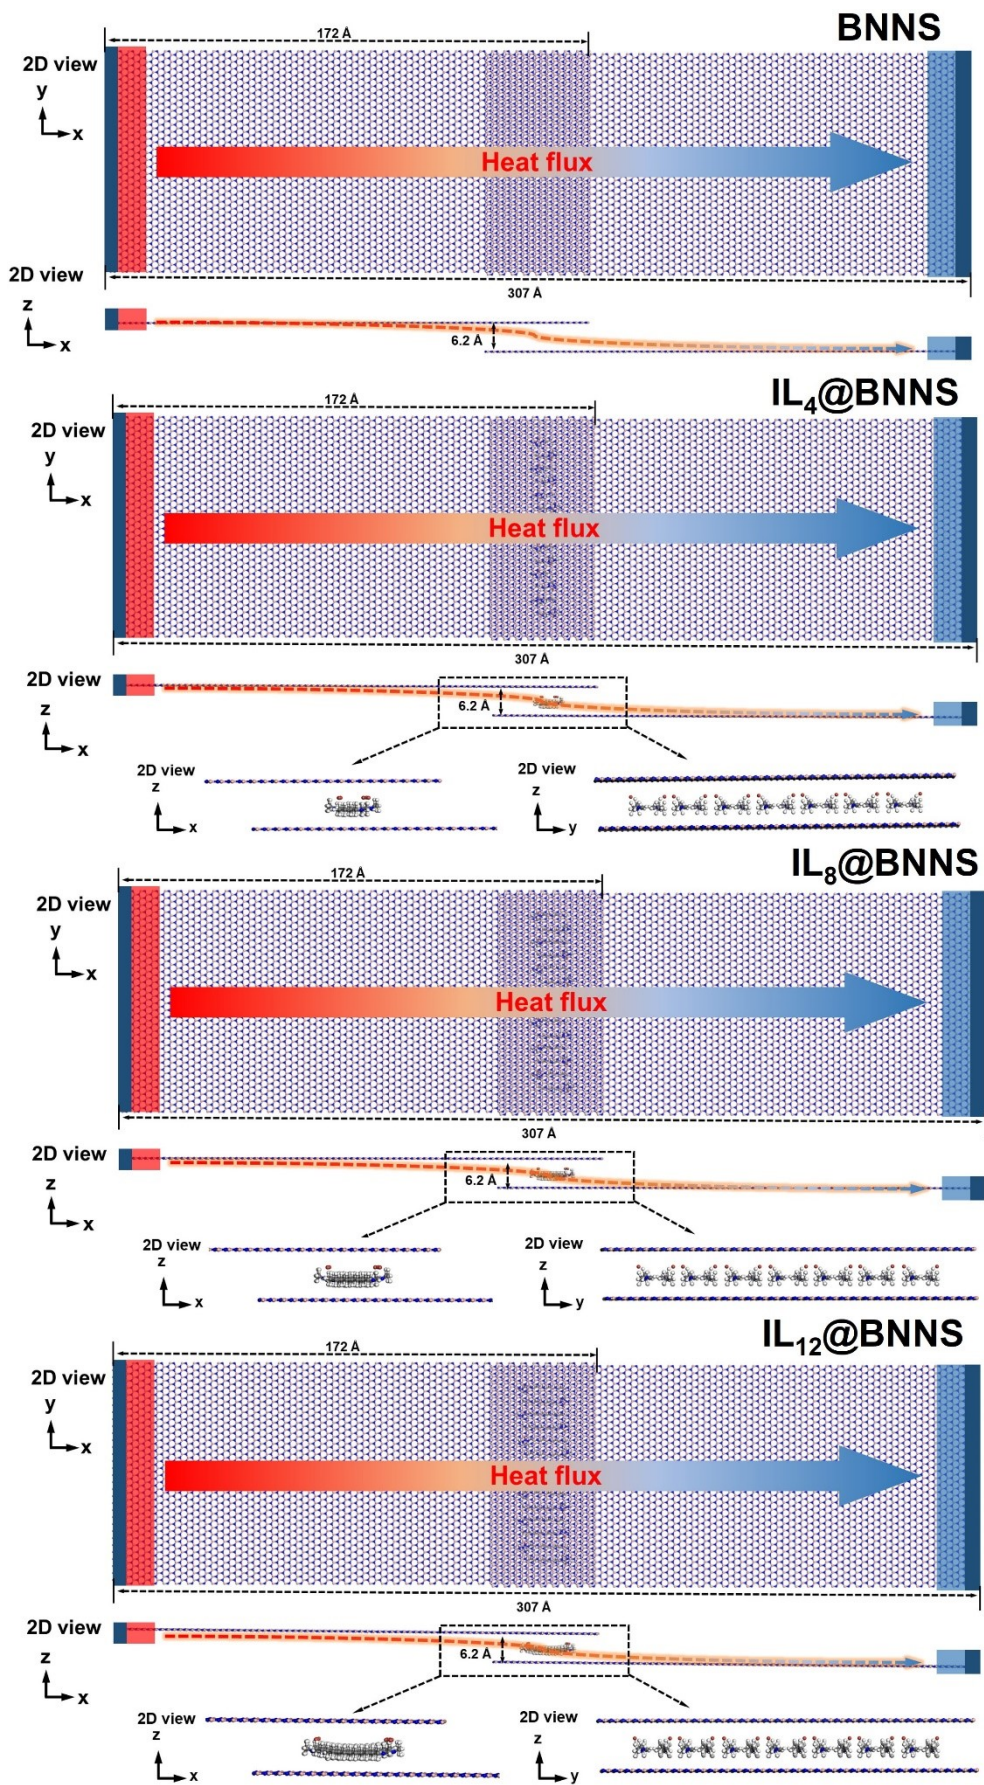

Fig. S17 Simulation modeling of BNNS, IL<sub>4</sub>@BNNS, IL<sub>8</sub>@BNNS, and IL<sub>12</sub>@BNNS, respectively.

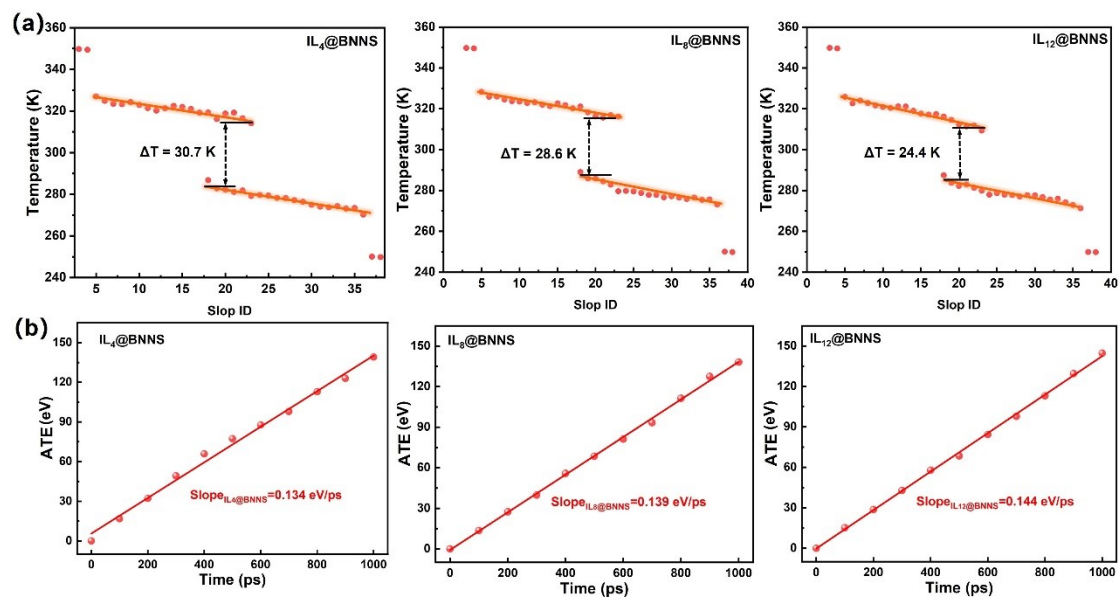

**Fig. S18** (a) Steady-state temperature profile of IL<sub>4</sub>@BNNS, IL<sub>8</sub>@BNNS and IL<sub>12</sub>@BNNS obtained using the NEMD.

(b) ATE as a function of the time in steady state for IL<sub>4</sub>@BNNS, IL<sub>8</sub>@BNNS and IL<sub>12</sub>@BNNS, respectively.



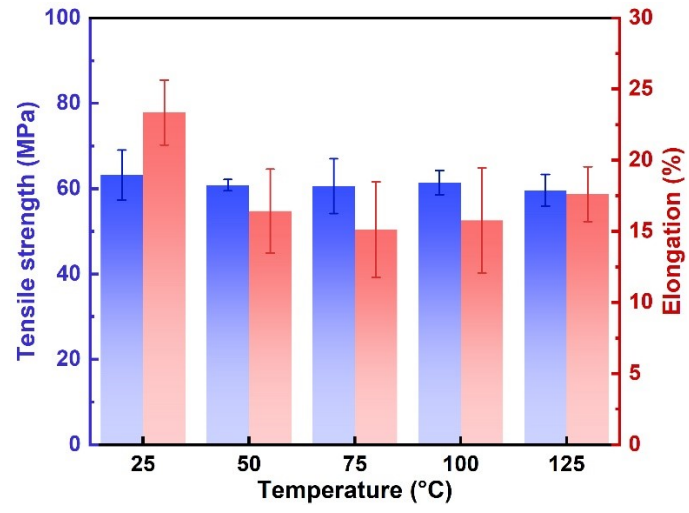

Fig. S19 Mechanical properties of 16-IL@BNNS<sub>40</sub>/ANF with temperature variation.

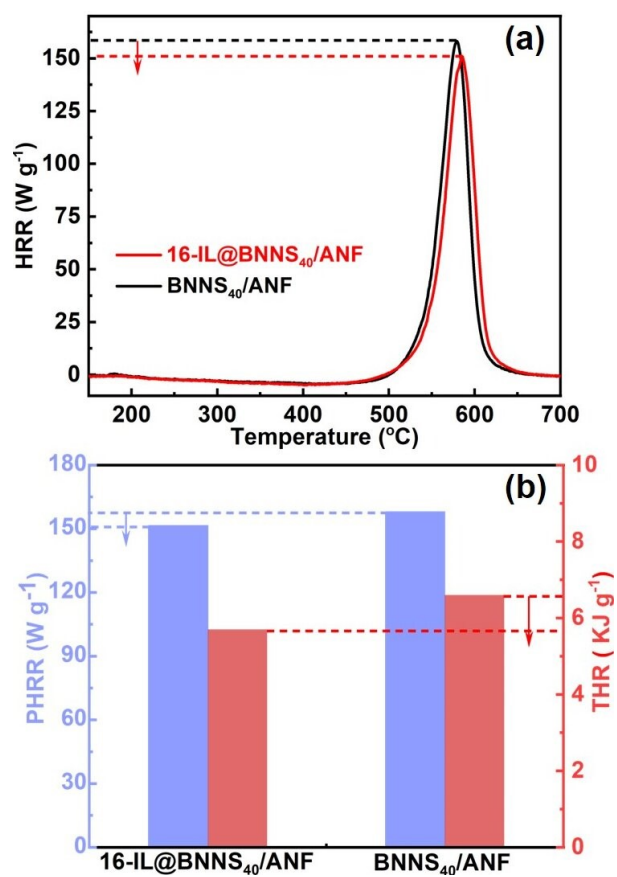

Fig. S20 (a) Heat release rate curves and (b) PHRR and THR values of 16-IL@BNNS<sub>40</sub>/ANF and BNNS<sub>40</sub>/ANF.

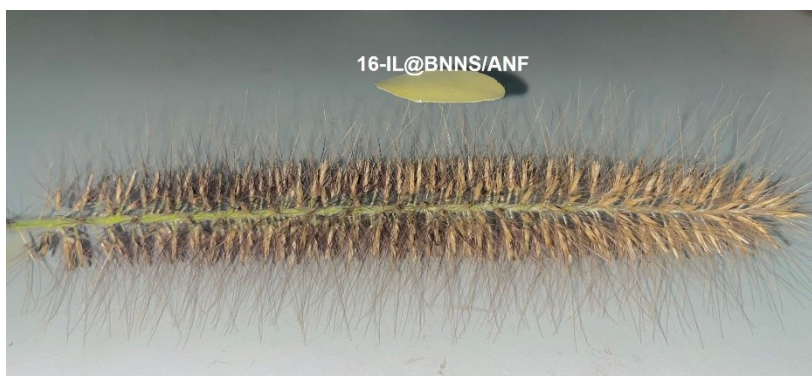

**Fig. S21** Digital image of 16-IL@BNNS/ANF on setaria viridis.

## Reference

- [1] S. H. Wu, K. J. Brzozowski, *J Colloid Interface Sci.*, 1971, **37**, 686-690.
- [2] D. Liu, B. Liu, C. Wang, W. Jin, Q. Zha, G. Shi, D. Wang, X. Sang, C. Ni, *ACS Sustain. Chem. Eng.*, 2020, **8**, 2167-2175.
- [3] C. Teng, L. Su, J. Chen, J. Wang, *Compos. Part A Appl. Sci. Manuf.*, 2019, **124**, 105498.
- [4] Z. H. Yin, J. H. Guo, X. H. Jiang, *Compos. Sci. Technol.*, 2021, **209**, 108794.
- [5] Z. Yang, L. H. Zhou, W. Luo, J. Y. Wan, J. Q. Dai, X. G. Han, K. Fu, D. Henderson, B. Yang, L. B. Hu, *Nanoscale*, 2016, **8**, 19326-19333.
- [6] M. Wang, Z. Jiao, Y. Chen, X. Hou, L. Fu, Y. Wu, S. Li, N. Jiang, J. Yu, *Compos. Part A Appl. Sci. Manuf.*, 2018, **109**, 321-329.
- [7] Z. Liu, J. Li, X. Liu, *ACS Appl. Mater. Interfaces*, 2020, **12**, 6503-6515.
- [8] X. L. Zheng, Y. J. Zhan, J. Shi, M. E. Lu, K. Wu, *Nanoscale*, 2023, **15**, 13025-13036.
- [9] Z.-G. Wang, W. Liu, Y.-H. Liu, Y. Ren, Y.-P. Li, L. Zhou, J.-Z. Xu, J. Lei, Z.-M. Li, *Compos. B. Eng.*, 2020, **180**, 107569.
- [10] T. Morishita, H. Okamoto, *ACS Appl. Mater. Interfaces*, 2016, **8**, 27064-27073.
- [11] D. Hu, H. Liu, Y. Ding, W. Ma, *Carbohydr. Polym.*, 2021, **264**, 118058.
- [12] J. Chen, X. Huang, Y. Zhu, P. Jiang, *Adv. Funct. Mater.*, 2017, **27**, 1604754.
- [13] X. Wang, M. Sun, R. Wang, L. Jiao, H. Bian, H. Dai, *Mater. Des.*, 2022, **214**, 110379.
- [14] J. J. Hu, T. R. Zhang, L. L. Wang, Z. Q. Shi, H. Y. Xia, *ACS Appl. Mater. Interfaces*, 2023, **15**, 12315-12326.
- [15] D. L. Zhang, J. W. Zha, W. K. Li, C. Q. Li, S. J. Wang, Y. Q. Wen, Z. M. Dang, *Compos. Sci. Technol.*, 2018, **156**, 1-7.
- [16] T. Ma, Y. Zhao, K. Ruan, X. Liu, J. Zhang, Y. Guo, X. Yang, J. Kong, J. Gu, *ACS Appl. Mater. Interfaces*, 2020, **12**, 1677-1686.
- [17] H. L. Lee, O. H. Kwon, S. M. Ha, B. G. Kim, Y. S. Kim, J. C. Won, J. Kim, J. H. Choi, Y. Yoo, *Phys. Chem. Chem. Phys.*, 2014, **16**, 20041-20046. Z. Yang, L. H. Zhou, W. Luo, J. Y. Wan, J. Q. Dai, X. G. Han, K. Fu, D. Henderson, B. Yang, L. B. Hu, *Nanoscale*, 2016, **8**, 19326-19333.
- [18] H. Yuan, T. Li, Y. Wang, X. Wang, X. Zhang, B. Xia, P. Ma, T. Liu, M. Chen, W. Dong, *Comp. Commun.*, 2021, **27**, 100851.
- [19] J. He, J. Song, Y. Xu, X. Zhang, H. Zhou, W. Zhang, Y. Li, W. Yan, H. Ye, L. Xu, *ACS Appl. Polym. Mater.*, 2023, **5**, 6232-6343.

- [20] X. Wang, P. Wu, *ACS Appl. Mater. Interfaces*, 2018, **10**, 2504-2514.
- [21] X. Shi, R. Zhang, K. Ruan, T. Ma, Y. Guo, J. Gu, *J. Mater. Sci. Technol.*, 2021, **82**, 239-249.
